# Supplementary material for: Serum Concentrations of Selected Organochlorines in Pregnant Women and Associations with Pregnancy Outcomes. A Cross-Sectional Study from Two Rural Settings in Cambodia
Source: PubMed Central journal article supplement (PMC7589876; doi:10.3390/ijerph17207652), 2020-10-20
Supplement: ijerph-17-07652-s001.pdf [file ijerph-17-07652-s001.pdf]

**Table S1.** Blood levels (wet weight picogram/microliter) of polychlorinated biphenyls (PCBs), hexachlorocyclohexane (HCH) and organochlorine pesticides (OCPs) in the inland and floating area.

\* Geometric mean with 95% confidence intervals.

| POPs               | Inland Area (n = 120) |             |        |             | Floating Area (n = 74) |             |        |             |
|--------------------|-----------------------|-------------|--------|-------------|------------------------|-------------|--------|-------------|
|                    | GM*                   | 95% CI*     | Median | Min-Max     | GM*                    | 95% CI*     | Median | Min-Max     |
| PCB 52             | 0.010                 | 0.010-0.010 | 0.010  | 0.010-0.010 | 0.010                  | 0.010-0.010 | 0.010  | 0.010-0.010 |
| PCB 99             | 0.008                 | 0.008-0.008 | 0.008  | 0.008-0.055 | 0.008                  | 0.008-0.008 | 0.008  | 0.008-0.008 |
| PCB 101            | 0.016                 | 0.016-0.016 | 0.016  | 0.016-0.020 | 0.016                  | 0.016-0.016 | 0.016  | 0.016-0.016 |
| PCB 118            | 0.018                 | 0.017-0.019 | 0.015  | 0.015-0.112 | 0.018                  | 0.017-0.020 | 0.015  | 0.015-0.048 |
| PCB 138            | 0.015                 | 0.014-0.017 | 0.012  | 0.012-0.601 | 0.016                  | 0.014-0.018 | 0.012  | 0.012-0.077 |
| PCB 153            | 0.022                 | 0.019-0.025 | 0.014  | 0.014-1.170 | 0.020                  | 0.017-0.022 | 0.014  | 0.014-0.073 |
| PCB 180            | 0.029                 | 0.028-0.030 | 0.028  | 0.028-0.223 | 0.029                  | 0.027-0.032 | 0.028  | 0.028-0.423 |
| $\alpha$ -HCH      | 0.043                 | 0.043-0.043 | 0.043  | 0.043-0.043 | 0.043                  | 0.043-0.043 | 0.043  | 0.043-0.043 |
| $\beta$ -HCH       | 0.103                 | 0.103-0.103 | 0.103  | 0.103-0.103 | 0.103                  | 0.103-0.103 | 0.103  | 0.103-0.103 |
| $\gamma$ -HCH      | 0.053                 | 0.053-0.053 | 0.053  | 0.053-0.053 | 0.053                  | 0.053-0.053 | 0.053  | 0.053-0.053 |
| $\delta$ -HCH      | 0.035                 | 0.034-0.035 | 0.034  | 0.034-0.070 | 0.034                  | 0.034-0.034 | 0.034  | 0.034-0.034 |
| HCB                | 0.039                 | 0.037-0.042 | 0.040  | 0.010-0.093 | 0.058                  | 0.051-0.065 | 0.054  | 0.011-0.196 |
| Heptachlor         | 0.137                 | 0.134-0.140 | 0.135  | 0.135-0.352 | 0.135                  | 0.135-0.135 | 0.135  | 0.135-0.135 |
| Heptachlor epoxide | 0.069                 | 0.069-0.069 | 0.069  | 0.069-0.069 | 0.069                  | 0.069-0.069 | 0.069  | 0.069-0.069 |
| o,p-DDE            | 0.008                 | 0.008-0.008 | 0.008  | 0.008-0.010 | 0.008                  | 0.008-0.008 | 0.008  | 0.008-0.008 |
| p,p'-DDE           | 0.627                 | 0.527-0.747 | 0.579  | 0.020-4.760 | 0.975                  | 0.811-1.170 | 0.869  | 0.270-8.050 |
| o,p-DDD            | 0.007                 | 0.007-0.008 | 0.007  | 0.007-0.018 | 0.007                  | 0.007-0.007 | 0.007  | 0.007-0.007 |
| p,p'-DDD           | 0.008                 | 0.008-0.008 | 0.008  | 0.008-0.010 | 0.008                  | 0.008-0.008 | 0.008  | 0.008-0.008 |
| o,p-DDT            | 0.020                 | 0.020-0.020 | 0.020  | 0.020-0.020 | 0.020                  | 0.020-0.020 | 0.020  | 0.020-0.020 |
| p,p'-DDT           | 0.039                 | 0.036-0.042 | 0.033  | 0.030-0.519 | 0.038                  | 0.034-0.042 | 0.033  | 0.033-0.401 |
| Mirex              | 0.022                 | 0.022-0.023 | 0.022  | 0.020-0.113 | 0.023                  | 0.022-0.024 | 0.022  | 0.022-0.061 |
| Aldrin             | 0.052                 | 0.052-0.052 | 0.052  | 0.050-0.052 | 0.052                  | 0.052-0.052 | 0.052  | 0.052-0.052 |

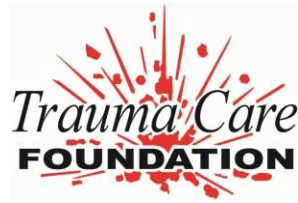

## The Questionnaires

The subject volunteered to participate in this study and agreed that we extract necessary information from their hospital records after delivery.

If you have questions or need more information, please do not hesitate to call To .....

Subject ID: .....

Area Code: ..... Health Center: .....

### SECTION A: MATERNAL SOCIOECONOMIC INFORMATION

1. Patients name: ..... Age:.....

2. Address:

.....Village.....Commune.....District:.....

Telephone number:.....

3. Gravida.....Para:.....

4. Education .....Occupation .....

5. Husband?  Death  A live  If alive how old is he?:.....

Education.....

Occupation.....

6. Major illnesses of mother,  No  Yes,

Specify.....

7. Medication of mother if daily,  No  Yes,

Specify.....

8. How many children do you already have?

Baby Girl: ....., Age.....

Baby Boy: ..... Age.....

Stillborn?:.....

Died under five?:.....

9. Breastfeeding of previous babies,  No  Yes, if yes how long.....

10. How long have you lived at present address: Years:.....

11. How do you describe your area of residence?  Urban  Rural

12. Sources of drinking water?  Tap  Lake  Rain water

Borehole  Bottle

Other,

specify:.....

13. Do you use pesticides  No  Yes, if yes where?  Inside home  Rice Field

On farm/garden

14. Do you or member of family fish?  No  Yes, if yes where?

Lake     Stream     Large River

## SECTION B: DIET AND LIFESTYLE

### Daily food sources of mother

| Type of Food      | Description | Frequency           |       |        |       |       |         |           |        |        |          |          |       |        |
|-------------------|-------------|---------------------|-------|--------|-------|-------|---------|-----------|--------|--------|----------|----------|-------|--------|
|                   |             | Medium serving size | Small | Medium | Large | Never | 1/month | 2-3 month | 1/week | 2/week | 3-4/week | 5-6/week | 1/day | 2+/day |
| Meat              |             |                     |       |        |       |       |         |           |        |        |          |          |       |        |
| Beef              | 100g        |                     |       |        |       |       |         |           |        |        |          |          |       |        |
| Pork              | 100g        |                     |       |        |       |       |         |           |        |        |          |          |       |        |
| Chicken           | 200g        |                     |       |        |       |       |         |           |        |        |          |          |       |        |
| Fish              |             |                     |       |        |       |       |         |           |        |        |          |          |       |        |
| Fresh Fish        | 100g        |                     |       |        |       |       |         |           |        |        |          |          |       |        |
| Dry salty Fish    | 50g         |                     |       |        |       |       |         |           |        |        |          |          |       |        |
| Smoke Fish        | 50g         |                     |       |        |       |       |         |           |        |        |          |          |       |        |
| Vegetable         |             |                     |       |        |       |       |         |           |        |        |          |          |       |        |
| Salad             | 50g         |                     |       |        |       |       |         |           |        |        |          |          |       |        |
| Cabages           | 100g        |                     |       |        |       |       |         |           |        |        |          |          |       |        |
| Spinages          | 100g        |                     |       |        |       |       |         |           |        |        |          |          |       |        |
| water convolvulus | 50g         |                     |       |        |       |       |         |           |        |        |          |          |       |        |
| Cucumber          | 50g         |                     |       |        |       |       |         |           |        |        |          |          |       |        |
| Eggplants         | 50g         |                     |       |        |       |       |         |           |        |        |          |          |       |        |
| luffa gourds      | 50g         |                     |       |        |       |       |         |           |        |        |          |          |       |        |
| Pumkins           | 50g         |                     |       |        |       |       |         |           |        |        |          |          |       |        |
| Moringa           | 50g         |                     |       |        |       |       |         |           |        |        |          |          |       |        |
| Beans             | 50g         |                     |       |        |       |       |         |           |        |        |          |          |       |        |
| Bean Sprouse      | 50g         |                     |       |        |       |       |         |           |        |        |          |          |       |        |
| Egg               | 1           |                     |       |        |       |       |         |           |        |        |          |          |       |        |

|            |      |  |  |  |  |  |  |  |  |  |  |  |  |  |
|------------|------|--|--|--|--|--|--|--|--|--|--|--|--|--|
| Papaya     | 100  |  |  |  |  |  |  |  |  |  |  |  |  |  |
| Others     |      |  |  |  |  |  |  |  |  |  |  |  |  |  |
| Rice       | 100g |  |  |  |  |  |  |  |  |  |  |  |  |  |
| Soya Bean  | 50g  |  |  |  |  |  |  |  |  |  |  |  |  |  |
| Mung Beans | 50g  |  |  |  |  |  |  |  |  |  |  |  |  |  |

|                 |       |  |  |  |  |  |  |  |  |  |  |  |  |
|-----------------|-------|--|--|--|--|--|--|--|--|--|--|--|--|
| Sweat Potatoe   | 1     |  |  |  |  |  |  |  |  |  |  |  |  |
| Sugar Can Juice | 1 cup |  |  |  |  |  |  |  |  |  |  |  |  |
| Corn            | 1     |  |  |  |  |  |  |  |  |  |  |  |  |
| Coconut         | 1     |  |  |  |  |  |  |  |  |  |  |  |  |
| Banana          | 1     |  |  |  |  |  |  |  |  |  |  |  |  |
| Mango           | 1     |  |  |  |  |  |  |  |  |  |  |  |  |
| Pinapple        | 1     |  |  |  |  |  |  |  |  |  |  |  |  |
| Milk            | 1 can |  |  |  |  |  |  |  |  |  |  |  |  |

15. Sources of food:  Own/local production  Local market  
 Supermarket  Imported

**Lifestyle of mother**

- ☛ Do you smoke?  No  
 Yes, ☛ If yes how many cigarettes daily.....
- ☛ Do you drink alcohol  
 No  
 Yes, ☛ If yes what kind.....  
☛ How many tots daily.....

**SECTION C: MATERNAL INFORMATION POST DELIVERY MEDICAL INFORMATION**

To be completed by attending Health Center Staff or designated field worker.

1. Maternal weight before delivery: ..... Kilograms .....
2. Maternal height: .....cm.....
3. Previous spontaneous abortions 1. trimester: (if available).....
  - 1 at how many months
  - 2 at how many months
  - 3 at how many months
4. Previous spontaneous abortions 2. trimester (if available).....
  - 1 at how many months
  - 2 at how many months
  - 3 at how many months
5. Previous preterm deliveries <week 37 (if available).....
  - 1 at how many months
  - 2 at how many months
  - 3 at how many months
6. Any infertility problems –time to pregnancy – if any:  
 .....
7. Any complication/problems during pregnancy (hypertension, pre-eclampsia, infections).....  
 .....

**SECTION D: INFORMATION ABOUT THE NEWBORN CHILD**

1. Mode of delivery:  Normal Deliver  Vacuum  CS
2. Birth weight of baby: .....kg.....
3. Birth length of baby: .....cm
4. Head circumference of baby: .....cm
5. Gestation age of baby (based on Naegele term):
6. APGAR score 1min.....  
 5min..... Any sign of asphyxia?  No  
 Yes

- 7. Gender of baby.....
- 8. Congenital malformations (visible at birth)  No  Yes
- 9. Any other medical observations or conditions  
 No  Yes, Specify .....
